# Supplementary material for: CD200-CD200R1 inhibitory signaling prevents spontaneous bacterial infection and promotes resolution of neuroinflammation and recovery after stroke
Source: PubMed Central journal article supplement (PMC6378746; doi:10.1186/s12974-019-1426-3), 2019-02-18

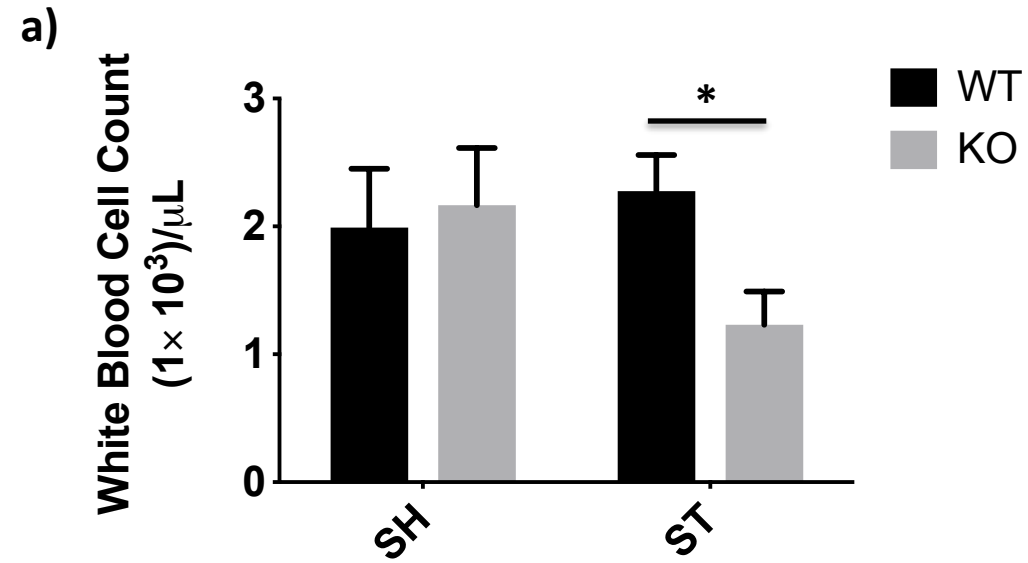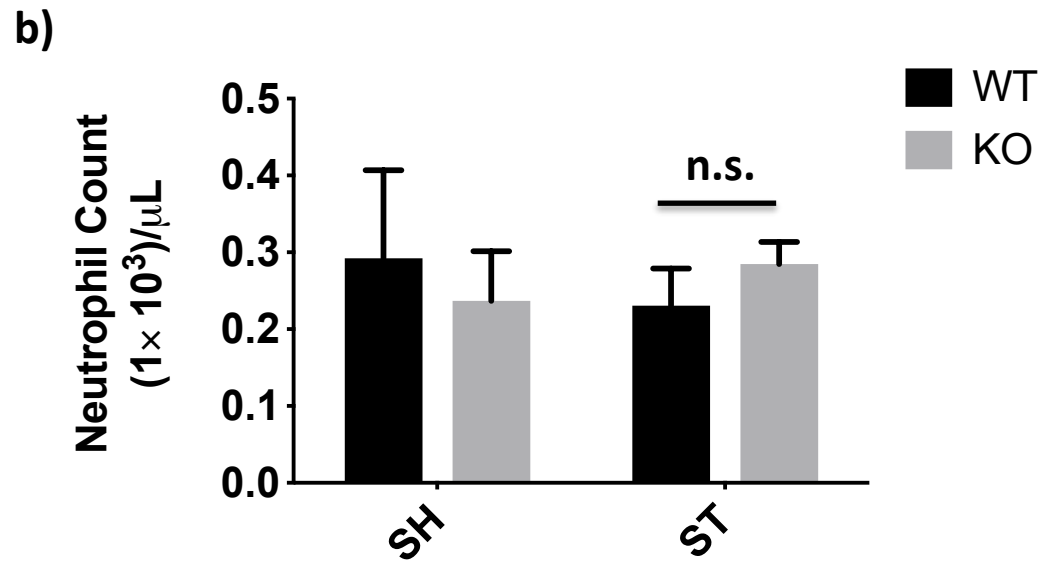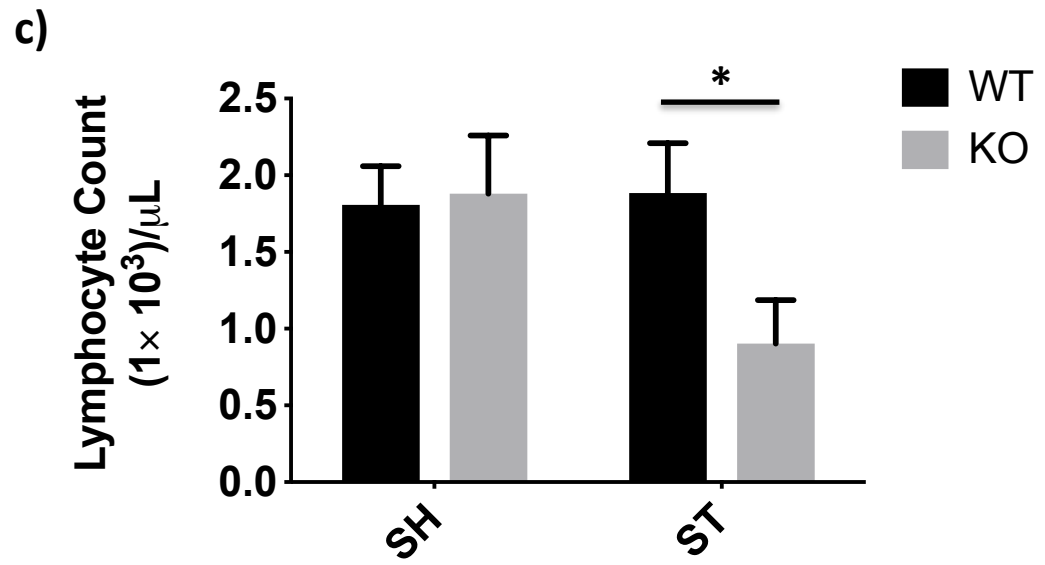

Supplement: 12974_2019_1426_MOESM3_ESM.pdf [file 12974_2019_1426_MOESM3_ESM.pdf]
